1 **The founder missense mutation of *WFDC2* in Koreans leads to severe respiratory**  
2 **distress accompanied by bronchiectasis and rhinosinusitis**

3

4 Jae Won Roh,<sup>1,2,8</sup> Jiyoung Oh,<sup>3,8</sup> Se Jin Kim,<sup>1,2,8</sup> Ji Won Hong,<sup>1,2,8</sup> Jiyeon Ohk,<sup>4</sup> Hyo Sup  
5 Shim,<sup>5</sup> Hyung-Ju Cho,<sup>6</sup> Ala Woo,<sup>7</sup> Song Yee Kim,<sup>7</sup> Young Ae Kang,<sup>7</sup> Hosung Jung,<sup>4</sup> Kyung  
6 Won Kim,<sup>3,\*</sup> Moo Suk Park,<sup>7,\*</sup> Heon Yung Gee<sup>1,2,\*</sup>

7

8 <sup>1</sup>Department of Pharmacology, Graduate School of Medical Science, Brain Korea 21 Project,  
9 Yonsei University College of Medicine, Seoul 03722, Republic of Korea

10 <sup>2</sup>Woo Choo Lee Institute for Precision Drug Development, Seoul 03722, Republic of Korea

11 <sup>3</sup>Department of Pediatrics, Severance Hospital, Yonsei University College of Medicine, Seoul  
12 03722, Republic of Korea

13 <sup>4</sup>Department of Anatomy, Graduate School of Medical Science, Brain Korea 21 Project,  
14 Yonsei University College of Medicine, Seoul 03722, Republic of Korea

15 <sup>5</sup>Department of Pathology, Yonsei University College of Medicine, Seoul, Korea

16 <sup>6</sup>Department of Otorhinolaryngology, The Airway Mucus Institute, Korea Mouse  
17 Phenotyping Center (KMPC), Taste Research Center, Yonsei University College of Medicine,  
18 Seoul 03722, Republic of Korea

19 <sup>7</sup>Department of Internal Medicine, Severance Hospital, Yonsei University College of  
20 Medicine, Seoul 03722, Republic of Korea

21 <sup>8</sup>These authors contributed equally

22 \*Correspondence:

23 Kyung Won Kim

24 Department of Pediatrics, Yonsei University College of Medicine, 50-1 Yonsei-Ro,

25 Seodaemun-gu, Seoul 03722, Korea; +82-2-2228-2050; email: [kwkim@yuhs.ac](mailto:kwkim@yuhs.ac)

26

27 Moo Suk Park

28 Department of Internal Medicine, Yonsei University College of Medicine, 50-1 Yonsei-Ro,

29 Seodaemun-gu, Seoul 03722, Korea; +82-2-2228-1955; email: [pms70@yuhs.ac](mailto:pms70@yuhs.ac)

30

31 Heon Yung Gee

32 Department of Pharmacology, Yonsei University College of Medicine, 50-1 Yonsei-Ro,

33 Seodaemun-gu, Seoul 03722, Korea; +82-2-2228-8755; email: [HYGEE@yuhs.ac](mailto:HYGEE@yuhs.ac)

34 **ABSTRACT**

35 **Background**

36 Chronic airway diseases like cystic fibrosis (CF) and primary ciliary dyskinesia (PCD) pose  
37 substantial clinical challenges. This study explores the p.C97W variant in *WFDC2*, proposed  
38 as a new genetic origin of respiratory distress, especially among Koreans.

39 **Methods**

40 Whole-exome/genome sequencing (WES/WGS) were performed on 64 patients from 62  
41 families presenting with severe bronchiectasis and chronic rhinosinusitis. *In vitro* analyses  
42 and protein modeling were utilized to evaluate the functional implications of the *WFDC2*  
43 variant.

44 **Results**

45 Pathogenic variants were found in 11.3% of families, including a novel homozygous *WFDC2*  
46 missense variant (c.291C>G, p.Cys97Trp) in five unrelated families, confirmed by Sanger  
47 sequencing. The variant, rare globally but more frequent in Koreans, caused persistent wet  
48 cough, chronic rhinosinusitis, and bronchiectasis in affected patients. Lung tissue pathology  
49 showed chronic inflammation and interstitial fibrosis. The p.C97W variant impaired *WFDC2*  
50 protein folding, secretion, and function.

51 **Conclusions**

52 The p.C97W variant in *WFDC2* is a critical genetic factor in severe chronic airway disease  
53 that shares clinical features with CF and PCD. Given its implications for diagnosis and  
54 treatment, genetic testing for *WFDC2* mutations in individuals with CF or PCD-like  
55 symptoms is recommended.

56     **INTRODUCTION**

57     In humans, the respiratory epithelium is critical for air transport, mucociliary clearance, and  
58     immune regulation. The airway epithelium comprises various cell types, including basal,  
59     ciliated, goblet, and club cells, as well as rare types like tuft cells, ionocytes, and  
60     neuroendocrine cells.<sup>1</sup> The mucosal surface of the respiratory tract contributes to innate  
61     immune defense. Each epithelial cell type plays a distinct role in maintaining airway integrity  
62     and the mucociliary clearance system, by producing antioxidants, protease inhibitors,  
63     antimicrobial peptides, or by secreting mucins and surfactants.<sup>2,3</sup> Dysregulation of these  
64     processes due to genetic or environmental factors can lead to the pathophysiology of severe  
65     viral infections and chronic pulmonary disorders, including asthma,<sup>1,4,5</sup> cystic fibrosis  
66     (CF),<sup>1,6-8</sup> and primary ciliary dyskinesia (PCD).<sup>1,9,10</sup>

67             In this study, we identified a homozygous missense variant (c.291C>G, p.C97W) in  
68     *WFDC2*, a serine/threonine protease inhibitor with anti-bacterial activity, through whole-  
69     exome and genome sequencing in families affected by respiratory conditions resembling  
70     PCD. Individuals with this variant exhibited chronic inflammation, bronchiectasis, interstitial  
71     fibrosis, and infections caused by *Pseudomonas aeruginosa*. Due to its implications for  
72     diagnosis and treatment, genetic testing for *WFDC2* mutations is recommended for  
73     individuals with CF or PCD-like symptoms.

## 74     **RESULTS**

### 75     **Identification of the *WFDC2* variant**

76     The WES or WGS analysis pipeline to identify the potential genetic causes in patients with  
77     severe bronchiectasis and chronic rhinosinusitis (n = 64 from 62 families) is shown in Fig. S1.  
78     Pathogenic variants were identified in 7 of the 62 families (11.3%): five with variants in  
79     PCD-linked genes (six patients) and two (two patients) with *CFTR* variants (Fig. 1A, B).  
80     Furthermore, a homozygous missense variant (c.291C>G, p.Cys97Trp) in *WFDC2* was  
81     identified in five unrelated families (Fig. 1C, and Fig. S2). Sanger sequencing confirmed this  
82     homozygous mutation in affected probands and their siblings, while the unaffected mother  
83     was heterozygous (Fig. 1D). The allele frequency of this variant was 0.00001611 in the  
84     global population 0.0004051 in East Asians, and 0.0018 in the Korean population, as reported  
85     in the Genome Aggregation Database (gnomAD; Table S1). Haplotype analysis revealed that  
86     individuals carrying the c.291C>G *WFDC2* mutation shared a genomic region of  
87     approximately 138.5 kb surrounding the variant (Table S2). Subsequent haplotype analysis  
88     using the LDhap Tool<sup>11</sup> using eight selected SNPs within the shared region revealed that  
89     individuals with the c.291C>G *WFDC2* mutation share a rare H4 haplotype, with a frequency  
90     of 0.63% in the homozygous state (Table S2). This finding suggests this variant as a founder  
91     allele.

92

### 93     **Clinical phenotypes of individuals with the *WFDC2* variant**

94     All six patients from five unrelated families presented with persistent wet cough and chronic  
95     rhinosinusitis (Fig. 2C). Chest CT scans revealed bronchiectasis in five patients, while one  
96     patient (P1946-21) declined the scan (Fig. 2A). Pathological examination of the original lung  
97     tissue from three female patients (P1969-21, P2678-21, and P2783-21) who underwent lung

98 transplantation at an average age of 33 years (range: 21–41 years; Table 1) revealed chronic  
99 inflammation, bronchiectasis, and interstitial fibrosis (Fig. 2D). All patients had *P. aeruginosa*  
100 lung infections, and pulmonary function demonstrated a severe airflow obstruction pattern  
101 before lung transplantation. Two siblings (P5-21 and P5-22) of three male patients recently  
102 visited our hospital, both presenting with bronchiectasis and reduced FEV1% predicted (Fig.  
103 2B, and Table 1).

104 The average age at the onset of respiratory symptoms was 7.8 years (range, 1 month  
105 to 13 years). Initial clinical diagnoses based on respiratory symptoms included neonatal  
106 pneumonia in patients P1946-21 and P1969-21; bronchiectasis in patients P2678-21, P2783-  
107 21, P5-21, and P5-22; and chronic rhinosinusitis in patients P5-21 and P5-22. Bronchiectasis  
108 was confirmed during childhood in two-thirds of the patients, with one patient diagnosed at  
109 late 0's (P2678-21) and three patients diagnosed at early 10's (P2783-21, P5-21, and P5-22).  
110 The three patients who underwent lung transplants (P1969-21, P2678-21, and P2783-21)  
111 have maintained stable lung structure and function for two, seven, and fourteen years,  
112 respectively (Fig. 2, and Table 1).

113

#### 114 **Effect of p.C97W variant on WFDC2 function**

115 As shown in Fig. 3A, WFDC2 contains a N-terminal signal peptide that is involved in  
116 trafficking and secretion, and two whey acidic protein (WAP) domains connected by a short  
117 loop. Each WAP domain includes eight cysteine residues that form four disulfide bonds.  
118 Structure prediction using AlphaFold2<sup>12</sup> showed that C97 located in the second WAP domain  
119 forms a disulfide bond with C109 (Fig. 3A). Multiple sequence alignments of human  
120 WFDC2 with its orthologs from several vertebrate species demonstrated that both C97 and  
121 C109 are highly conserved across vertebrates (Fig. 3B). Additionally, the *in silico* prediction

122 scores classified the C97W variant as pathogenic or disease-causing (Table S1).

123           Next, we predicted the structures of both the wild-type (WT) and p.C97W mutant  
124 *WFDC2* using ColabFold<sup>13</sup> and AlphaFold2.<sup>12</sup> The p.C97W mutant failed to form a disulfide  
125 bond with C109, in contrast to WT (Fig. 3C). Additionally, the bulky side chain of the Trp  
126 (W) residue disrupted hydrogen bond formation near W97 in the second WAP domain (Fig.  
127 3C). *WFDC2* forms dimeric structures;<sup>14</sup> therefore, we predicted the dimeric structures of WT  
128 and p.C97W. Clustering of the structures from multiple AlphaFold2 runs showed that the  
129 p.C97W structure predominantly exists in a 'trans-trans' configuration, where the second  
130 WAP domain is untangled and interacts with the other subunit. In contrast, the WT *WFDC2*  
131 dimers were more likely to exist in the 'cis' configuration (Fig. 3C, and Fig. S3).

132           Assessment of the effects of the p.C97W mutant on *WFDC2* secretion in human  
133 embryonic kidney (HEK293T) cells overexpressing WT or p.C97W *WFDC2* revealed that  
134 WT *WFDC2* produced a single band of approximately 24 kDa in both the lysate and culture  
135 media. In contrast, the p.C97W variant was not secreted and showed reduced expression in  
136 the lysate (Fig. 3D). Immunofluorescence analysis in HEK293T cells showed colocalization  
137 of both WT and p.C97W *WFDC2* with the endoplasmic reticulum marker, suggesting no  
138 defect in intracellular localization (Fig. S4A). Furthermore, treatment with tunicamycin, an  
139 inhibitor of N-linked glycosylation, or glycosidase digestion by incubation of cell lysates  
140 with glycosidases, such as PNGase F or Endo H, demonstrated that both WT and p.C97W  
141 were glycosylated (Fig. S4B, C), as indicated by the shift in band molecular weight with  
142 no difference between the WT and mutant (Fig. S4B, C). This finding indicated that  
143 *WFDC2* was glycosylated, as previously described.<sup>14</sup> In summary, these findings indicated  
144 that the p.C97W mutation disrupts *WFDC2* protein folding and secretion, impairing its  
145 function.

146 **DISCUSSION**

147 In this study, we identified a novel *WFDC2* mutation (c.291C>G; p.C97W) as the causative  
148 factor in severe lung disease. This autosomal recessive variant leads to chronic inflammation,  
149 bronchiectasis, interstitial fibrosis, and severe airflow obstruction, often necessitating lung  
150 transplantation. Population data from gnomAD and KRGDB indicate that this allele has a  
151 relatively high frequency in East Asian populations, particularly in the Korean population.  
152 Based on these data, approximately three out of one million individuals are homozygous for  
153 this mutation, suggesting that around 150 individuals in South Korea could be affected. In  
154 contrast, the previously reported c.145T>C; p.C49R variant, identified as a European founder  
155 allele, is extremely rare in East Asian populations, including Koreans. However, it has a  
156 higher frequency in the European population with an allele frequency of 0.0001814,  
157 equivalent to three individuals per ten million and approximately 2,239 patients in Europe.  
158 Additionally, 22 loss-of-function (LoF) alleles in *WFDC2* have been reported in gnomAD,  
159 with a combined homozygous frequency of approximately 0.000000003178.

160 Respiratory phenotypes of *WFDC2* deficiency identified in our study and another  
161 study<sup>15</sup> present with clinical features that closely resemble CF and PCD, with symptoms  
162 including bronchiectasis, chronic rhinosinusitis, and recurrent respiratory infections. Like CF,  
163 patients with *WFDC2* mutations develop bronchiectasis across all lung lobes and are prone to  
164 chronic *P. aeruginosa* infections, indicating a more severe and diffuse impact on lung  
165 structure in *WFDC2* deficiency and CF compared to PCD. Furthermore, nasal and sinus  
166 abnormalities, including chronic rhinosinusitis and nasal polyps, are prevalent across all three  
167 conditions. In this study, three patients with *WFDC2* mutations underwent lung  
168 transplantation due to respiratory failure, further highlighting the severe progression of the  
169 disease.



170           The *WFDC2* c.291C>G; p.C97W variant shares molecular similarities with the  
171 previously described c.145T>C; p.C49R variant.<sup>15</sup> Both are autosomal recessive missense  
172 mutations in cysteine residues within the WAP domain, a critical region for disulfide bond  
173 formation, and lead to LoF by disrupting the WAP domain. The key difference between the  
174 two variants is that the p.C49R variant affects the first WAP domain, while the p.C97W  
175 variant affects the second. Additionally, unlike the p.C49R variant, which is associated with  
176 glycosylation defects,<sup>15</sup> our data did not reveal glycosylation differences for the p.C97W  
177 variant, nor did it alter intracellular localization compared to the WT protein. Structural  
178 modeling using AlphaFold2,<sup>12</sup> aligns well with the disruption of WAP domain integrity due to  
179 the loss of disulfide bonds, suggesting that improper dimer formation might explain the  
180 differences in the effects of the p.C97W variant. Despite these structural differences, both  
181 variants exhibit similar defects in protein secretion, suggesting comparable pathological  
182 consequences in humans.

183           In conclusion, we identified the p.C97W *WFDC2* variant as a novel cause of severe  
184 chronic airway disease, which is physiologically distinct but clinically similar to CF and PCD.  
185 Our study revealed the prevalence of the *WFDC2* p.C97W variant in the Korean population,  
186 suggesting genetic testing for this gene could be beneficial in patients who have respiratory  
187 phenotypes resembling PCD or CF.

188 **METHODS**

189 **Study design**

190 This study was approved by the Institutional Review Board of Severance Hospital, Yonsei  
191 University Health System (IRB #4-2013-0770 and #4-2024-0647). Written informed consent  
192 was obtained from the patients for their participation in this study and the publication of their  
193 clinical data. Sixty-four patients with severe bronchiectasis and chronic rhinosinusitis from  
194 62 unrelated families were enrolled from both the PCD-like severe bronchiectasis and chronic  
195 rhinosinusitis and lung transplantation cohorts at a single tertiary medical center in South  
196 Korea. These patients met the European Respiratory Society guidelines for the clinical  
197 diagnosis of PCD,<sup>16</sup> which include symptoms such as persistent wet cough, chronic  
198 rhinosinusitis, or bronchiectasis. Whole-exome sequencing (WES) or whole-genome  
199 sequencing (WGS) was performed to identify potential genetic causes. In-depth genetic  
200 analyses were performed on individuals without any potential molecular causes.

201

202 **Analysis of whole exome/genome sequencing data**

203 Genomic DNA was extracted from blood samples of patients clinically suspected of having  
204 PCD using a DNeasy Kit (Qiagen, Germany). Whole exome sequencing (WES) was  
205 performed using a SureSelect V5 kit (Agilent Technologies, Santa Clara, CA, USA) and an  
206 Illumina HiSeq 2500. Raw WES FASTQ files were imported into CLC Genomics Workbench  
207 version 9.5.3 for data analysis. Sequenced reads were mapped to the human reference  
208 genome, GRCh37/hg19. Variants were detected using the Basic Variant Caller of the CLC  
209 Genomics Workbench, with a minimum coverage of 5, a count of 2, and a frequency of 20%.  
210 Low-coverage whole genome sequencing (WGS) was performed using a PCR-free DNBSEQ  
211 platform (BGI, Beijing, China). Following GATK best practice guidelines, the reads were

212 aligned to the human reference genome GRCh37/hg19 using the Burrows-Wheeler Aligner  
213 (BWA-MEM). Duplicates were marked, reads were sorted, and the mapping quality was  
214 recalibrated using PICARD-MarkDuplicates and GATK-BQSR. Variant calling of single  
215 nucleotide variants (SNVs) and small insertions and deletions (indels) was performed using  
216 GATK-HaplotypeCaller, and low-quality variants with a depth of coverage (DP) < 5 and  
217 genotype quality (GQ) < 20 were filtered out. Copy Number Variation (CNV) analysis was  
218 performed using EXCAVATOR version 2.2 and ExomeDepth (version 1.1.10) with default  
219 settings for the WES data. For WGS data, CNVnator  
220 (v0.3.2, <https://github.com/abyzovlab/CNVnator>) and GATK-SV  
221 (<https://github.com/broadinstitute/gatk-sv>) were used to detect CNV. Mitochondrial variants  
222 and transposable element insertion calling were performed using Mutect2 and xTea (v0.1.9;  
223 <https://github.com/parklab/xTea>).

224 SNVs and small indels were annotated using Variant Annotation tools in the CLC  
225 Workbench or ANNOVAR software. SNVs and small indels were first filtered based on  
226 minor allele frequency (MAF), applying a threshold of MAF < 1% according to the Single-  
227 Nucleotide Polymorphisms Database (dbSNP), Genome Aggregation Database (gnomAD),  
228 and Korean Reference Genome Database (KRGDB); variants that were nonsynonymous or  
229 located in splice sites were selected. To evaluate pathogenicity and prioritize the candidate  
230 causing variants, *in silico* prediction algorithms, such as MutationTaster, Sorting Tolerant  
231 from Intolerant (SIFT), Combined Annotation Dependent Depletion (CADD), Polymorphism  
232 Phenotyping v2 (PP2) scores, and public databases including Online Mendelian Inheritance  
233 in Man (OMIM) and ClinVar, were used. Interpretation of the variants was performed  
234 according to the American College of Medical Genetics and Genomics (ACMG) guidelines.  
235 To identify splice site variants, SpliceAI was run on the variants using Ensembl's Variant

236 Effect Predictor (VEP) tool and filtered using a threshold MAF of 1% and delta score  
237 threshold of 0.1. Variants were annotated based on their presence in human candidate cis-  
238 regulatory elements, as identified using the SCREEN database from the Encyclopedia of  
239 DNA Elements (ENCODE) project. Confirmation of the detected variants was performed  
240 manually using the Integrative Genomics Viewer (IGV) and through segregation analysis  
241 using Sanger sequencing.

242

### 243 **Structural prediction and clustering**

244 AlphaFold2<sup>12</sup> and ColabFold<sup>13</sup> were used to construct the *de novo* monomer and dimer  
245 WFDC2 structures, respectively. The AlphaFold2-multimer-V2 algorithm was applied  
246 without using a template or minimization, using three recycle number parameters in  
247 ColabFold. The full-length WT or p.C97W human WFDC2 sequence was used as input. To  
248 generate different structural conformations, multiple runs were conducted using different seed  
249 values in ColabFold software. A total of 100 different structures were generated for the WT  
250 monomer, C97W, homodimer WT, and p. C97W. The monomer and dimer structures were  
251 then structurally aligned to perform principal component analysis (PCA) using the bio3d  
252 package<sup>17</sup> in R. The *K*-means algorithm was implemented to cluster the structures. The  
253 optimal number of clusters suggested by R. ChimeraX<sup>18</sup> was used to visualize protein  
254 structures.

255

### 256 **Cell culture, plasmids, and transfection**

257 Human embryonic kidney (HEK) 293T cells (#CRL-3216, American Type Culture Collection,  
258 Manassas, VA, USA) were cultured in Dulbecco's modified Eagle's medium (DMEM)  
259 supplemented with 10% fetal bovine serum and penicillin (50 IU/mL)/streptomycin

260 (50 µg/mL; Invitrogen, Waltham, MA, USA). The cells were incubated in a 5% CO<sub>2</sub>  
261 environment at 37°C.

262 Plasmids encoding human *WFDC2* (NM\_006103.4) and mouse *Wfdc2*  
263 (NM\_026323.2, isoform 1 and NM\_001374655.1, isoform 2) were purchased from OriGene  
264 (Rockville, MD, USA). The coding sequences were amplified by PCR and subcloned into the  
265 pcDNA3.4 vector using XbaI and AgeI sites. During PCR, 10xHIS tags were inserted directly  
266 into the 3' end in front of the stop codon. Human and mouse *WFDC2* mutants were  
267 introduced using the QuikChange mutagenesis method (Agilent Technologies). The pEYFP-  
268 ER plasmid was purchased from NovoPro Biosciences (San Diego, CA, USA).

269 HEK293T cells were seeded in 6-well plates the day before transfection. Plasmids  
270 were transfected using a PEI-MAX transfection reagent (Polysciences, Warrington, PA, USA)  
271 according to the manufacturer's protocol. A total of 0.5 µg of the desired plasmid and 2 µL of  
272 PEI-MAX was used for transfection. Cells were used for experiments 24–48 h post-  
273 transfection.

274

## 275 **Immunoblotting**

276 Forty-eight hours after transfection, HEK293T cells were washed twice with phosphate-  
277 buffered saline (PBS) and harvested in a lysis buffer containing 150 mM NaCl, 50 mM Tris-  
278 HCl (pH 7.4), 1 mM EDTA, 1% Triton X-100, and 1x protease inhibitor cocktail  
279 (#04693116001, Sigma-Aldrich, St. Louis, MA, USA). The cells were then briefly sonicated  
280 to break the cell membrane and homogenize the sample. Bradford assay was performed to  
281 measure the protein concentration at an absorbance of 595 nm. Cell lysates (40–60 µg) were  
282 used for analysis.

283 The samples were incubated in 2x sodium dodecyl sulfate (SDS) sample buffer

284 containing dithiothreitol (DTT, 0.02 g/mL) for 30 min at room temperature and subsequently  
285 separated using SDS-polyacrylamide gel electrophoresis (PAGE). The separated proteins  
286 were transferred onto a nitrocellulose membrane (GE Healthcare, Chicago, IL, USA), which  
287 was blotted using suitable primary antibodies and horseradish peroxidase-conjugated  
288 secondary antibodies in 5% skimmed milk. Protein bands were visualized using the  
289 SuperSignal West Pico kit (Thermo Fisher Scientific) and a blue film (Afga, Belgium). The  
290 density of each protein band was quantified using the ImageJ software (<https://imagej.net/ij/>).

291 To detect secreted WFDC2 proteins, transfected cells were incubated in a serum-free  
292 medium for 24 h. Culture media were collected and concentrated using Amicon Ultra-4 filters  
293 (Millipore, Burlington, MA, USA). The concentrated media was directly heated with 2x SDS  
294 sample buffer with DTT and subjected to SDS-PAGE.

295 The following primary and secondary antibodies were used: anti-HIS (#2365, Cell  
296 Signaling Technologies, Danvers, MA, USA; 1:1000 dilution), anti-ALDOA (#sc-390733,  
297 Santa Cruz Biotechnology, Santa Cruz, TX, USA; 1:000 dilution), HRP Anti-beta Actin  
298 antibody (#ab20272, Abcam, Cambridge, UK; 1:2000 dilution), goat anti-rabbit IgG  
299 polyclonal antibody (HRP conjugate) (#ADI-SAB-300-J, Farmingdale, Enzo Life Sciences,  
300 NY, USA), and goat anti-mouse IgG F(ab')<sub>2</sub> polyclonal antibody (HRP conjugate) (#ADI-  
301 SAB-100-J; Enzo Life Sciences; 1:1000 dilution).

302

### 303 **Immunocytochemistry**

304 Transfected HEK293T cells were cultured on an 18 mm round coverslip. Cells were washed  
305 twice with PBS, fixed with 4% paraformaldehyde for 10 min, again washed twice with PBS,  
306 and permeabilized with 0.15% Triton X-100 in PBS for 10 min. The cells were washed twice  
307 with PBS and incubated with a blocking buffer consisting of 5% donkey serum for 1 h at

308 room temperature. After blocking, the cells were incubated with the appropriate primary  
309 antibodies for 1 h at room temperature and washed three times with PBS. Subsequently, the  
310 cells were stained with secondary antibodies conjugated to a fluorescent marker for 1 h at  
311 room temperature and washed thrice with PBS. The samples were mounted onto glass slides  
312 using a mounting medium (Agilent Dako, CA, USA), and images were captured using a  
313 confocal microscope (LSM 700, Carl Zeiss, Germany) equipped with a 40× objective lens.

314 The following primary and secondary antibodies were used: anti-HIS (#2365, Cell  
315 Signaling Technologies; 1:200 dilution), Alexa Fluor 594 donkey anti-rabbit (#A21207,  
316 Invitrogen; 1:400 dilution), Alexa Fluor 647 Phalloidin (#A22287, Invitrogen; 1:400 dilution).

317

### 318 **Deglycosylation assay**

319 Two methods were used to determine the glycosylation state of WFDC2. After transfection,  
320 cells were treated with 2 μM tunicamycin (Sigma-Aldrich) for 20 h. A higher dose or longer  
321 incubation time with tunicamycin caused excessive cell death, preventing further analysis.

322 The cells were harvested and subjected to SDS-PAGE, followed by immunoblotting.

323 Transfected cells were denatured in 2x SDS sample buffer containing DTT. Denatured

324 samples were incubated with PNGase F or Endo H (New England Biolabs, Ipswich, MA,

325 USA) according to the manufacturer's protocol. Deglycosylated samples were analyzed using

326 SDS-PAGE and immunoblotting. The shift in protein size was analyzed using both methods.

327 **FUNDING AND SUPPORT**

328 This work was supported by the National Research Foundation (NRF) grants funded by the  
329 Korean government (2018R1A5A2025079 and RS-2023-00261905 to H.Y.G. and the Korea  
330 Mouse Phenotyping Project RS-2024-00400118 to H.Y.G.). This work was supported by the  
331 National Research Foundation of Korea (NRF) grant funded by the Korea government (MSIT)  
332 (No. 2022R1A2C1010462 to K.W.K.).

333

334 **COMPETING INTERESTS**

335 The authors declared that no conflicts of interest.

336

337 **ACKNOWLEDGEMENTS**

338 We thank the families that participated in this study. We also thank the Yonsei Advanced  
339 Imaging Center and Carl Zeiss Microscope.



340       **REFERENCES**

- 341       1.       Davis JD, Wypych TP. Cellular and functional heterogeneity of the airway epithelium. *Mucosal*  
342       Immunity 2021;14(5):978-990. DOI: 10.1038/s41385-020-00370-7.
- 343       2.       Hiemstra PS, McCray PB, Jr., Bals R. The innate immune function of airway epithelial cells in  
344       inflammatory lung disease. *Eur Respir J* 2015;45(4):1150-62. DOI:  
345       10.1183/09031936.00141514.
- 346       3.       Lee S-N, Yoon J-H. The Role of Proprotein Convertases in Upper Airway Remodeling.  
347       *Molecules and Cells* 2022;45(6):353-361. DOI: <https://doi.org/10.14348/molcells.2022.0019>.
- 348       4.       Jevnikar Z, Ostling J, Ax E, et al. Epithelial IL-6 trans-signaling defines a new asthma  
349       phenotype with increased airway inflammation. *J Allergy Clin Immunol* 2019;143(2):577-590.  
350       DOI: 10.1016/j.jaci.2018.05.026.
- 351       5.       Vieira Braga FA, Kar G, Berg M, et al. A cellular census of human lungs identifies novel cell  
352       states in health and in asthma. *Nat Med* 2019;25(7):1153-1163. DOI: 10.1038/s41591-019-  
353       0468-5.
- 354       6.       De Rose V, Molloy K, Gohy S, Pilette C, Greene CM. Airway Epithelium Dysfunction in Cystic  
355       Fibrosis and COPD. *Mediators Inflamm* 2018;2018:1309746. DOI: 10.1155/2018/1309746.
- 356       7.       Zoso A, Sofoluwe A, Bacchetta M, Chanson M. Transcriptomic profile of cystic fibrosis airway  
357       epithelial cells undergoing repair. *Sci Data* 2019;6(1):240. DOI: 10.1038/s41597-019-0256-6.
- 358       8.       Whitsett JA. Airway Epithelial Differentiation and Mucociliary Clearance. *Ann Am Thorac Soc*  
359       2018;15(Suppl 3):S143-S148. DOI: 10.1513/AnnalsATS.201802-128AW.
- 360       9.       Leigh MW, Horani A, Kinghorn B, O'Connor MG, Zariwala MA, Knowles MR. Primary Ciliary  
361       Dyskinesia (PCD): A genetic disorder of motile cilia. *Transl Sci Rare Dis* 2019;4(1-2):51-75.  
362       DOI: 10.3233/TRD-190036.
- 363       10.       Bustamante-Marin XM, Ostrowski LE. Cilia and Mucociliary Clearance. *Cold Spring Harb*  
364       *Perspect Biol* 2017;9(4). DOI: 10.1101/cshperspect.a028241.
- 365       11.       Machiela MJ, Chanock SJ. LDlink: a web-based application for exploring population-specific  
366       haplotype structure and linking correlated alleles of possible functional variants.  
367       *Bioinformatics* 2015;31(21):3555-7. DOI: 10.1093/bioinformatics/btv402.
- 368       12.       Jumper J, Evans R, Pritzel A, et al. Highly accurate protein structure prediction with  
369       AlphaFold. *Nature* 2021;596(7873):583-589. DOI: 10.1038/s41586-021-03819-2.
- 370       13.       Mirdita M, Schutze K, Moriwaki Y, Heo L, Ovchinnikov S, Steinegger M. ColabFold: making  
371       protein folding accessible to all. *Nat Methods* 2022;19(6):679-682. DOI: 10.1038/s41592-022-  
372       01488-1.
- 373       14.       Bingle L, Ames H, Williams D, et al. Expression and function of murine WFDC2 in the  
374       respiratory tract. *bioRxiv* 2020:2020.05.05.079293. DOI: 10.1101/2020.05.05.079293.
- 375       15.       Dougherty GW, Ostrowski LE, Nöthe-Menchen T, et al. Recessively Inherited Deficiency of

- 376            Secreted WFDC2 (HE4) Causes Nasal Polyposis and Bronchiectasis. *Am J Respir Crit Care*  
377            *Med* 2024;210(1):63-76. (In eng). DOI: 10.1164/rccm.202308-1370OC.
- 378        16. Lucas JS, Barbato A, Collins SA, et al. European Respiratory Society guidelines for the  
379            diagnosis of primary ciliary dyskinesia. *Eur Respir J* 2017;49(1). DOI:  
380            10.1183/13993003.01090-2016.
- 381        17. Grant BJ, Rodrigues AP, ElSawy KM, McCammon JA, Caves LS. Bio3d: an R package for  
382            the comparative analysis of protein structures. *Bioinformatics* 2006;22(21):2695-6. DOI:  
383            10.1093/bioinformatics/btl461.
- 384        18. Pettersen EF, Goddard TD, Huang CC, et al. UCSF ChimeraX: Structure visualization for  
385            researchers, educators, and developers. *Protein Sci* 2021;30(1):70-82. DOI:  
386            10.1002/pro.3943.
- 387        19. Waterhouse AM, Procter JB, Martin DM, Clamp M, Barton GJ. Jalview Version 2--a multiple  
388            sequence alignment editor and analysis workbench. *Bioinformatics* 2009;25(9):1189-91. DOI:  
389            10.1093/bioinformatics/btp033.
- 390

391

## FIGURE LEGENDS

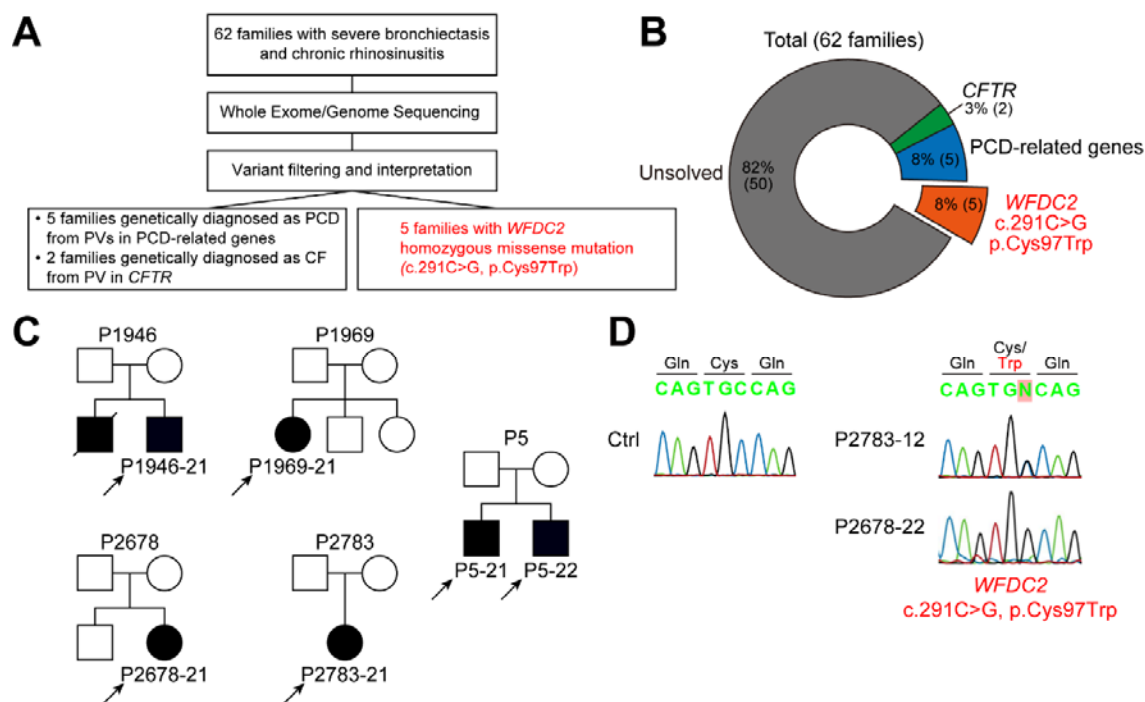

392

393 **Fig. 1. Identification of a homozygous variant in *WFDC2* in families with severe**  
394 **bronchiectasis and chronic rhinosinusitis.**

395 (A, B) Summary and result of WES/WGS analysis to elucidate the causal variants in patients  
396 with severe bronchiectasis and chronic rhinosinusitis. Five families had a homozygous  
397 variant in *WFDC2*, which was the c.291C>G substitution resulting in the amino acid change  
398 p.Cys97Trp. (C) Pedigree of five families with the c.291C>G *WFDC2* variant. The probands  
399 are indicated using arrows. (D) Sanger sequencing result of c.291C>G *WFDC2* variant  
400 representing individuals from three families. The altered amino acid is written in red. WES,  
401 Whole exome sequencing; WGS, whole genome sequencing.

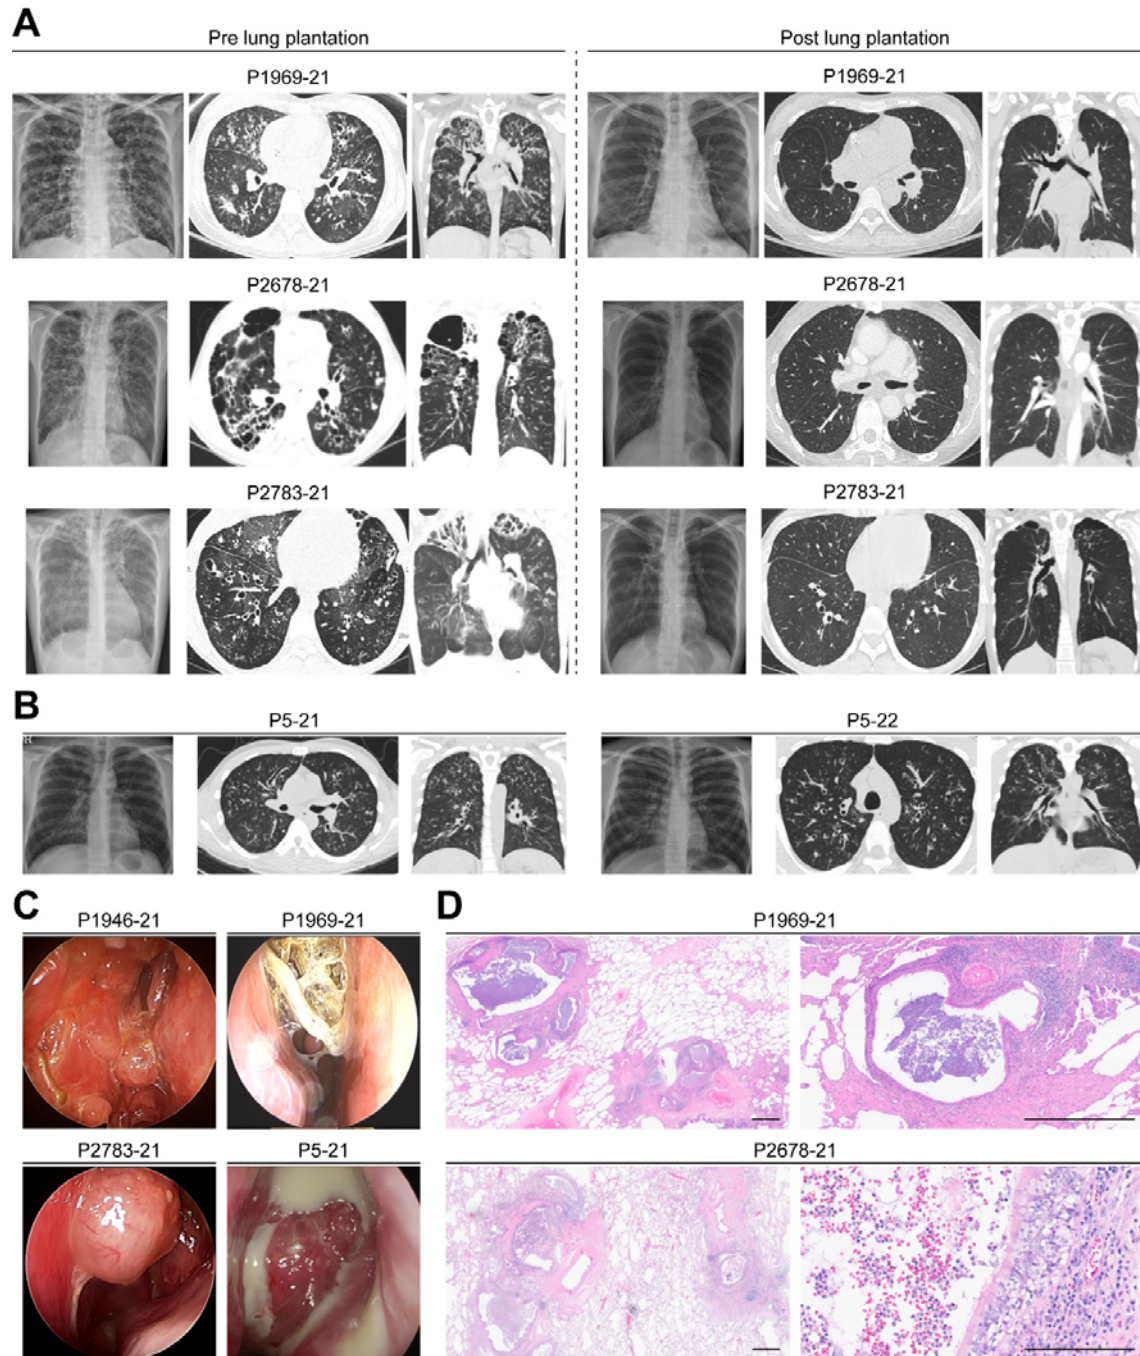

402

403 **Fig. 2. Clinical manifestation of individuals with bi-allelic *WFDC2* variant.**

404 (A) Radiologic findings of patients with progressive destructive lung diseases requiring lung  
405 transplantation. Left panels display extensive cystic/cylindrical bronchiectasis with bronchial  
406 wall thickening, fibrosis, and air trappings. Additionally, peribronchial and centrilobular

20

407 nodules are present, along with consolidations and bronchial mucoid stagnations (P1969-22),  
408 parenchymal destruction in the right upper lobe (P2678-22), and volume loss in both upper  
409 lobes (P2678-22). Right panels demonstrate much improved radiologic findings after lung  
410 transplantation, with no evidence of bronchiectasis, bronchial wall thickening, fibrosis, or air  
411 trappings. (B) P5-21 and P5-22 showed diffuse bronchiectasis with mucoid impactions and  
412 centrilobular nodules in both lungs. (C) Nasal endoscopic images showing polyposis and  
413 thick mucoid discharge. (D) Lung histology H&E staining images acquired during  
414 transplantation. Pathologic signs showed bronchiectasis with peribronchial inflammation and  
415 fibrosis (P1969-21) and bronchiectasis and bronchiolectasis with peribronchial inflammation  
416 and fibrosis (P2678-21). In (D), the scale bars are 50  $\mu\text{m}$ . H&E, hematoxylin and eosin.

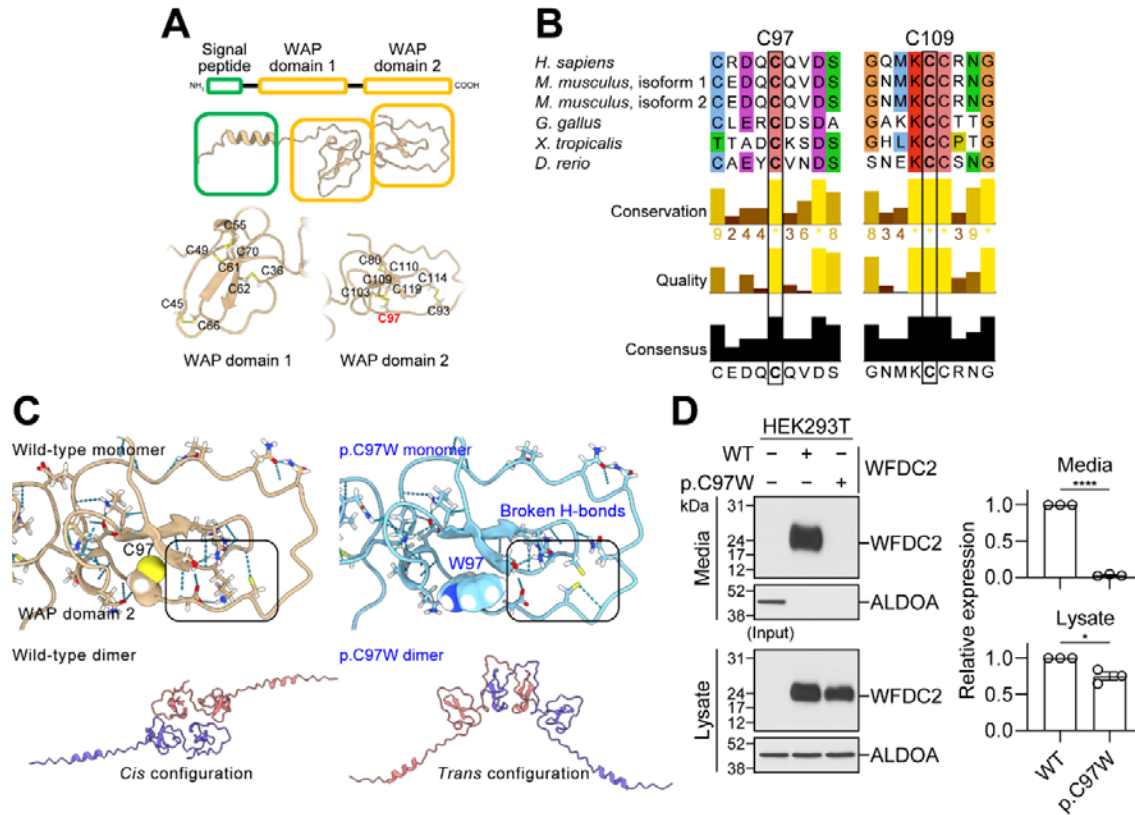

417

418 **Fig. 3. Molecular mechanism of WFDC2 p.C97W mutant.**

419 (A) Overall structure of the WFDC2 protein. Two WAP domains and the disulfide bond-  
 420 forming cysteines are shown. C97 forms a disulfide bond with C109. (B) Multiple sequence  
 421 alignment of human WFDC2 against its orthologs from five different vertebrate species was  
 422 performed using Jalview.<sup>19</sup> The mutated amino acid residue (C97) and the disulfide bond-  
 423 forming cysteine residue with C97 (C109) are indicated. (C) Monomer and homo-dimer  
 424 structure prediction of WFDC2 WT and p.C97W mutant by AlphaFold2.<sup>12,13</sup> (D) Western blot  
 425 analysis of WT and p.C97W mutant WFDC2 proteins in both the lysates and secreted media  
 426 of HEK293T cells overexpressing the proteins. In (D), data are presented in mean  $\pm$  standard  
 427 error of the mean. In (D), a two-way Student's t-test was used to calculate the p-value, and a  
 428 p-value  $< 0.05$  was considered significant. \*,  $p < 0.05$ ; \*\*\*\*,  $p < 0.0001$ .

**Table 1. Clinical characteristics of the patients**

| Patient                                             | P1946-21                  | P1969-21    | P2678-21              | P2783-21    | P5-21            | P5-22            |
|-----------------------------------------------------|---------------------------|-------------|-----------------------|-------------|------------------|------------------|
| Age at confirmation of <i>WFDC2</i> mutation, years | 31-35                     | 36-40       | 46-50                 | 31-35       | 21-25            | 21-25            |
| Sex                                                 | Male                      | Female      | Female                | Female      | Male             | Male             |
| Bronchiectasis                                      | N/A                       | Yes         | Yes                   | Yes         | Yes              | Yes              |
| <i>Pseudomonas aeruginosa</i> infection             | N/A                       | Yes         | Yes                   | Yes         | N/A              | N/A              |
| Chronic rhinosinusitis                              | Yes                       | Yes         | Yes                   | Yes         | Yes              | Yes              |
| Nasal polyposis                                     | No                        | No          | No                    | Yes         | Yes              | Yes              |
| Age at transferred, years                           | 26-30                     | 31-35       | 36-40                 | 16-20       | 21-25            | 21-25            |
| Lung Transplantation (age, years)                   | No                        | Yes (36-40) | Yes (41-45)           | Yes (21-25) | No               | No               |
| Medical history of siblings                         | Deceased due to pneumonia | No          | Reduced lung function | No          | Sibling of P5-22 | Sibling of P5-21 |
| Pulmonary function *                                |                           |             |                       |             |                  |                  |
| FEV <sub>1</sub> (% pred)                           | N/A                       | 29          | 21                    | 22          | 85               | 71               |
| FEV <sub>1</sub> (L)                                | N/A                       | 0.86        | 0.56                  | 0.69        | 3.55             | 3.14             |
| FEV <sub>1</sub> /FVC (%)                           | N/A                       | 44          | 49                    | 44          | 81               | 81               |
| DLCO                                                |                           | 37          |                       |             |                  |                  |

429 N/A, data not available

430 \* Pulmonary function tests were performed just before lung transplantation for P1969-21, P2678-21, and P2783-21, and most recently for P5-  
 431 1 and P5-2.
